# Supplementary material for: A Frameshift Mutation in Golden Retriever Dogs with Progressive Retinal Atrophy Endorses SLC4A3 as a Candidate Gene for Human Retinal Degenerations
Source: PLoS One. 2011 Jun 27;6(6):e21452. doi: 10.1371/journal.pone.0021452 (PMC3124514; doi:10.1371/journal.pone.0021452)
Supplement: Table S1 — Candidate gene primers. (XLS) [file pone.0021452.s004.xls]

## Sheet: Table S1
TABLE 1 CANDIDATE GENE PRIMERS
F primer Name	F primer Seq (5'-3')	R primer Name	R primer Seq (5'-3')	Product size (bp)	Tm	Genomic location (bp)
Primers for PCR amplification and Sanger sequencing
SLC4A3exn2_F	GTCCGGGTGCCCTTGGAG	SLC4A3exn2_R	ACTCAAAGTCACGCTCGCT		56
SLC4A3exn3a_F	GGAAGGACTAGGGTGACCTTG	SLC4A3exn3a_R	AGATTCCCCTTCCTCTTCCTC	347	58	29137955-29138301
SLC4A3exn3b_F	TGAGGCCCTGAGCTAGAATAA	SLC4A3exn3b_R	TTCAAGGGCACACCCCTAC	394	58	29137978-29138371
SLC4A3exn4_F	GAAAGCAAAGGTAGGGGTGTG	SLC4A3exn4_R	CTCTCCTCCCCTTGACAGTCT	327	54	29138343-29138669
SLC4A3exn5a_F	GTGGTTCCCCATCAAGTCC	SLC4A3exn5a_R	GCTCCCGCAGGTCGTAG	132	54	29140268-29140401
SLC4A3exn5b_F	CGAGTCGCTGGAGAGAAGAG	SLC4A3exn5b_R	GAGAGCACAGAGCTTCTCCAA	257	58	29140339-29140596
SLC4A3exn6_F	GTTGTGTAGACGTGGCCTCTG	SLC4A3exn6_R	AGCCTCTGGGGAGGACAG	312	58	29141911-29142223
SLC4A3exn8a_F	CTCCTCCGGCCTGTTTG	SLC4A3exn8a_R	AGACACGATCATGGTCTCCAC	168	56	29142901-29143068
SLC4A3exn8b_F	TCCTGGACCTGGAGCAGAC	SLC4A3exn8b_R	ATTCAGGCTGAGGCTAGAAGG	209	58	29143001-29143210
SLC4A3exn9-11_F	CTGCCTTACTTGCAGCTGACT	SLC4A3exn9-11_R	CCGTCGAGTCTCATGTCTCAT	1831	58	29143418-29145248
SLC4A3exn12-13_F	GGAAGCTCCTGGAGGAATAGA	SLC4A3exn12-13_R	CTAAGGTCCCATGACCACAGA	897	58	29145430-29146327
SLC4A3exn14-15_F	GTCTGTGGTCATGGGACCTTA	SLC4A3exn14-15_R	GGTTGCTCTAGCACTCACCTG	1280	58	29146305-29147585
SLC4A3exn16-17_F	GCAGAGGGTACAAGGAAGAGG	SLC4A3exn16-17_R	TGAAGGTGAACAGGTTTGGAG	1270	58	29147228-29148497
SLC4A3exn18_F	GTTTCCTGGAACGCTGGTACT	SLC4A3exn18_R	GTGAGCATCACTGGGTGAGAG	487	58	29148499-29148986
SLC4A3exn19-21_F	TGAGAACACCACTTTGGGAAC	SLC4A3exn19-21_R	ACTTTTCAAAACCCTCCTCCA	1519	58	29149094-29150612
SLC4A3exn22_F	GGCGTTGCTGTCACTGTTACT	SLC4A3exn22_R	TAATGAGCTCAAAGCCTGTGC	466	58	29150683-29151148
SLC4A3exn1-C_F	GAGGGCGTGTTTACAGACTCA	SLC4A3exn1-C_R	CACCACCTCCATCGAGTCAC	566	58	29141220-29141785
Internal primers for Sanger sequencing
SLC4A3exn9_IntF	CACCTCTCTCCCTAACCTGC	SLC4A3exn9_IntR	ATCATCCCATCCACACCTTC
SLC4A3exn10_IntF	GAAGGTGTGGATGGGATGAT	SLC4A3exn10_IntR	GGAGGTGAAAAGTTAACAGTCTCC
SLC4A3exn11_IntF	GGAGACTGTTAACTTTTCACCTCC
		SLC4A3exn12_IntR	GGCTCAGTCCCTCCCATG
SLC4A3exn13_IntF	CATGGGAGGGACTGAGCC
SLC4A3exn14_IntF	GAGTTGGGTCCCCAGGTC	SLC4A3exn14_IntR	ACAGGGGTGAGCTCCACAG
SLC4A3exn15_IntF	CTGTGGAGCTCACCCCTGT	SLC4A3exn15_IntR	CTTGTACCCTCTGCTCCCAAG
SLC4A3exn16_IntF	GTTGCCTGGTCAGGTACGTG	SLC4A3exn16_IntR	TGAGCTGGTCCCTCGAAATC
SLC4A3exn17_IntF	GATTTCGAGGGACCAGCTCA
		SLC4A3exn19_IntR	CAGACTCAGAAGGGACCTGAG
SLC4A3exn20_IntF	CTCAGGTCCCTTCTGAGTCTG	SLC4A3exn20_IntR	GGGTCACTCTGTCCGTCTC
SLC4A3exn21_IntF	GAGACGGACAGAGTGACCC
